# Supplementary material
Source: ML conference proceedings conference paper supplement (https://openaccess.thecvf.com/content/ICCV2025/html/Wang_Learning_Visual_Hierarchies_ICCV_2025_paper.html)
Supplement: Supplementary file 1 [file Wang_Learning_Visual_Hierarchies_ICCV_2025_supplemental.pdf]

# Learning Visual Hierarchies in Hyperbolic Space for Image Retrieval

## 1. Hierarchy Tree

Our part-based image hierarchy framework is designed to be widely applicable to general image datasets with bounding box annotations. In this section, we outline the key implementation involved in constructing hierarchy trees.

We introduce a general method to generate dataset-specific ground truth hierarchy trees based on data statistics. Following the approach outlined in Sec. 3.1 of the main paper, we begin by identifying bounding box pairs with substantial overlap. In this work, we define a bounding box pair when at least 80% of the smaller bounding box  $b$  is contained within either the full image or a larger bounding box. We initially set the overlap threshold at 100% and empirically adjusted it by evaluating the hierarchy’s validity using text labels. For the OpenImages dataset, 80% was found to be a suitable threshold. This is a design choice and can be adapted for other datasets.

These pairs are then filtered based on two criteria: a *frequency* threshold and a *proportion* threshold. For each pair, we record the *frequency* of occurrences (e.g., bicycle-to-wheel relationships) and calculate the *proportion* of instances where a child class appears within a parent class (e.g., the percentage of bicycle bounding boxes containing a wheel bounding box). Only pairs meeting both criteria, frequent occurrence and consistent labeling, are preserved. We choose *frequency* = 50 and *proportion* = 10% in our experiments.

Once entailment pairs are established, they are organized into hierarchical trees (see examples in Fig. 1). In the evaluation of hierarchical image retrieval, the order of the hierarchy tree is essential: for parent-to-child retrieval, lower-level concepts

below the child in the hierarchy tree are considered correct, while for child-to-parent retrieval, higher-level concepts above the input classes are correct.

## 2. Experiment Details

### 2.1. Hyperparameters and training details

We employ the AdamW optimizer with parameters  $(\beta_1, \beta_2) = (0.9, 0.999)$  and a learning rate of  $2 \times 10^{-5}$ . Training was conducted using 8  $\times$  A10G Nvidia GPUs. For each model, we used the largest batch size that fit in memory: CLIP ViT was trained with a total effective batch size of 320, and MoCo-v2 with a total effective batch size of 800. Each model was fine-tuned for a single epoch on *HierOpenImages* dataset, taking approximately 26 hours for CLIP ViT and 18 hours for MoCo-v2. The embeddings are projected to dimension 128 in the final layer. The hyperbolic model has a learnable curvature parameter.

During training, we filter out bounding boxes that occupy less than 1% of the full image area, as well as pairs involving small bounding boxes labeled as ‘IsGroupOf’ objects in the bounding box-to-bounding box relationships. For data augmentation, we apply randomly horizontal flip (20%), vertical flip(20%), rotate (degree =15), color jitter (brightness=0.2, contrast=0.2, saturation=0.2, hue=0.1), Gaussian blur (kernel size=5,  $\sigma = (0.3, 1.5)$ ), and then resize each image to  $224 \times 224$ .

### 2.2. Part-based Image Retrieval

**Data.** *HierOpenImages* is built from the OpenImages dataset [3], which originally contains approximately 1.9 million images, 14 million bounding boxes and 600 labels. We create image-to-bounding box pairs, including one cross-image bounding box

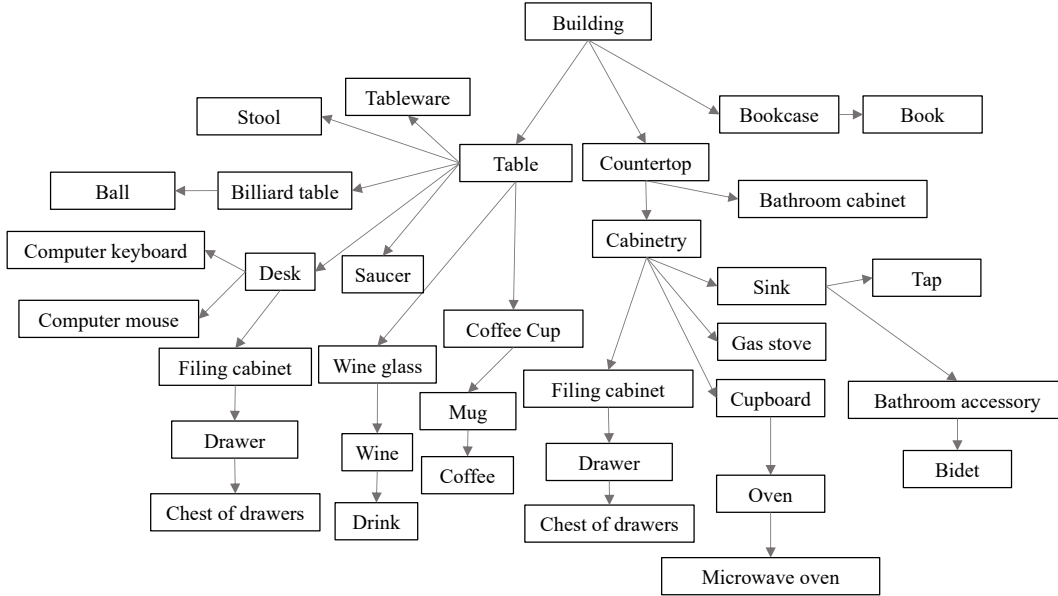

Figure 1. Example of a subset of hierarchical trees extracted from the OpenImages dataset.

sample for each bounding box class in the image, and bounding box to bounding box pairs where at least 80% of the smaller bounding box is contained in the larger bounding box.

During part-based image retrieval evaluation, we filter out bounding boxes for very small or large objects, and filter out noisy samples (*e.g.*, wrong labels, highly occluded, *etc.*). For part-based image retrieval, we randomly select a subset of 10,000 full images and 10,000 bounding box images as query images, using the entire filtered test set as candidates. The top-50 class frequency distributions for both the query and candidate sets are shown in Fig. 2. Although the query and candidate set distributions are similar, the class distribution is highly imbalanced, highlighting the importance of hierarchical retrieval evaluation using combined precision-recall curves and OT distances (Sec. 3.3; see Fig. 4 and Table 2 in the main paper).

**Same-Class Retrieval.** For part-to-full retrieval, a retrieval is considered correct if the retrieved full image contains the same object class as the query

bounding box image. For full-to-part retrieval, a retrieval is correct if the retrieved bounding box image corresponds to an object class within the query full image.

**Hierarchical Retrieval.** From a query parent image, correct child classes are all classes located at the lower level on the hierarchy tree of the labeled classes of the parent image (see examples in Fig. 1). For instance, when querying with a high-level full image, such as an image of a car, we expect to retrieve lower-level bounding boxes associated with the car, such as the car mirror, wheel or car plate *etc.* Conversely, when querying with a bounding box image, such as a wheel, we expect to retrieve various types of higher-level full images that include wheels, like cars, bicycles or cyclists *etc.*

**Hierarchical Retrieval Evaluation** To compute the optimal transport (1-D Wasserstein) distance between the retrieved label distribution and the ground truth (Table 2 and Fig. 4 in the main paper), we construct the ground truth distribution based on the fre-

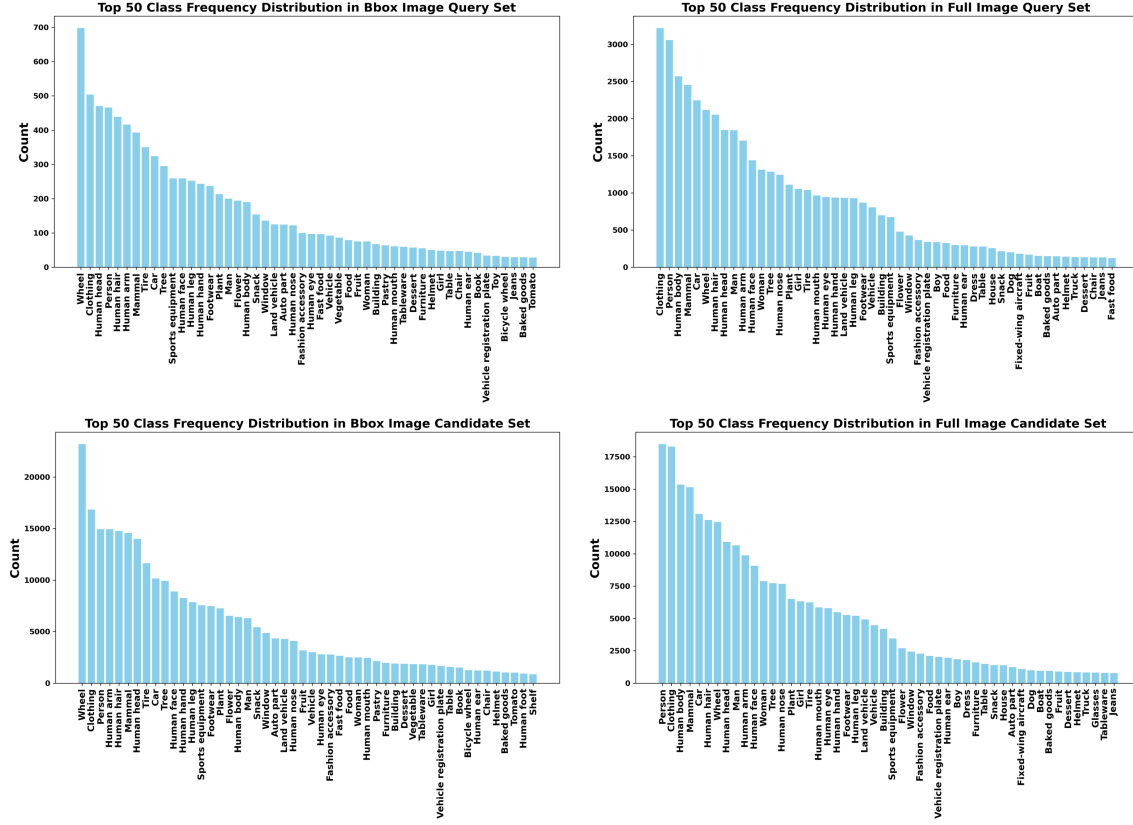

Figure 2. Bounding box class distribution in the candidate and query sets.

quency of each class (and its hierarchical classes) in the query parent image. We count the occurrences of each class in the candidate set and build the ground truth distribution by normalizing the frequencies to sum to 1. Similarly, the retrieval distribution is built by counting and normalizing retrieved class occurrences, and assigning any retrieved classes outside the ground truth hierarchy tree to an ‘others’ class. The two distributions are aligned by class order (ground truth distribution is zero in the ‘others’ class), and the 1-D Wasserstein distance is computed using the `scipy` library.

Note that the Wasserstein distance has a closed-form formula for 1-D data. If  $P$  and  $Q$  are represented as discrete empirical distributions (e.g., histograms or sorted samples of size  $n$ ), let  $\{x_1, x_2, \dots, x_n\}$  to be sorted values  $P$ , and

$\{y_1, y_2, \dots, y_n\}$  to be sorted values from  $Q$ , then the 1-D Wasserstein distance is:

$$W_p(P, Q) = \left( \frac{1}{n} \sum_{i=1}^n \|x_i - y_i\|^p \right)^{1/p},$$

where  $p$  refers to the order of the distance in the general p-Wasserstein metric.

In Table 2 of the main paper, we retrieve the Top-K results starting from a large K. This is necessary because each image contains an average of 5.29 distinct classes and 61.5 classes across hierarchical trees, requiring a large number of retrievals to accurately evaluate the distribution.

**Image Retrieval Interface via Gradio.** We built our image retrieval interface using Gradio [1], as

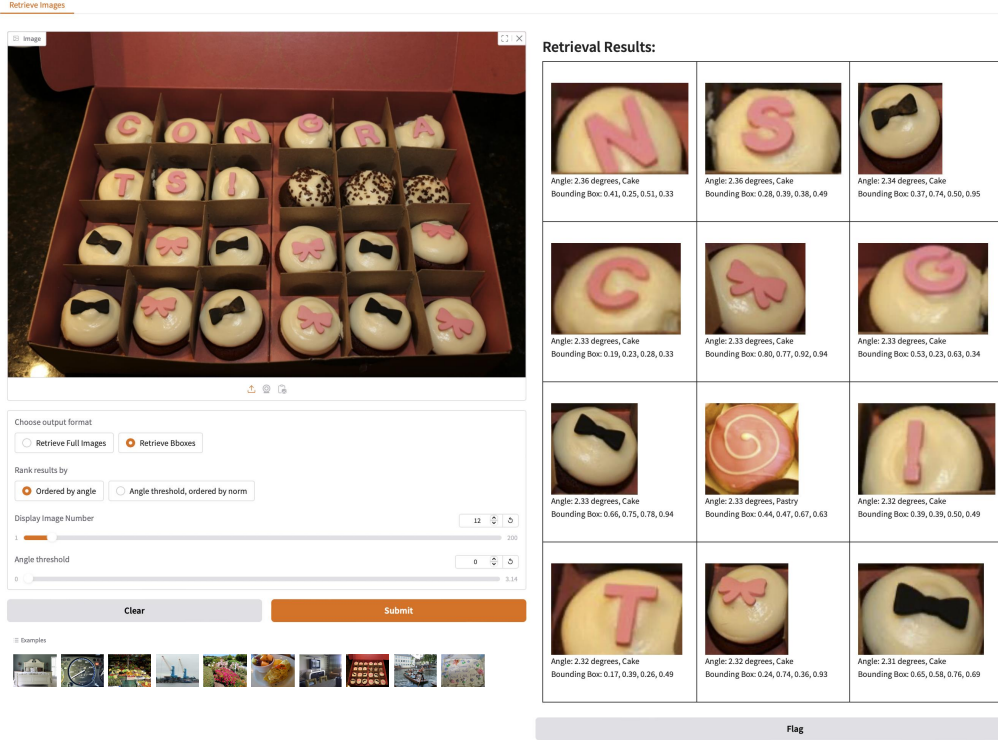

Figure 3. Example of our image retrieval interface built with Gradio [1]. The interface supports image selection, upload and retrieves results ranked by user-defined modes. Its modular design allows for easy integration of additional functionalities.

shown in Fig. 3. Input images can be selected from a linked image folder, where thumbnail images are displayed in an image gallery, or they can be directly uploaded by users. The retrieval results can be sorted by the hyperbolic angle relative to the input image or filtered using a user-defined threshold value, after which the results are ordered by their embedding norms. Additional functionalities can be easily integrated into the current pipeline.

### 2.3. Generalization Evaluation

**LVIS Dataset.** We evaluate the generalization capability of our model on the out-of-domain LVIS dataset [2], which is designed for large-scale ( $\sim 1.2M$  bounding boxes) long-tail instance classification and segmentation. It has a highly imbalanced distribution of 1,203 object categories and contains

897 object categories that are absent from OpenImages [3]. Here are some examples of unseen hierarchies in LVIS [2] but not in OpenImages [3]: {table  $\rightarrow$  tablecloth  $\rightarrow$  ashtray  $\rightarrow$  cigarette}, {backpack  $\rightarrow$  strap  $\rightarrow$  belt buckle}, {toy  $\rightarrow$  teddy bear  $\rightarrow$  thread  $\rightarrow$  bobbin}, {sofa  $\rightarrow$  blanket  $\rightarrow$  quilt  $\rightarrow$  bedspread}. The full list of these categories can be found in the appendix. Only display the first class of synonyms.

We construct the hierarchical evaluation set from the validation set of the LVIS dataset [2], following the similar process as constructing *HierOpenImages*. To construct the ground truth hierarchy tree, we use the pipeline as described in Sec. 1. We empirically choose parameter *frequency* = 5 and *proportion* = 5% in our experiments. This adjustment is necessary because the LVIS dataset [2] has very unbalanced

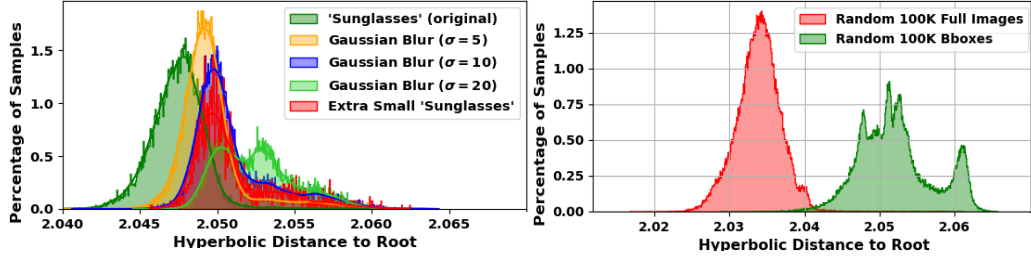

Figure 4. **Example of the model’s emergent structure.** In the left plot, the percentage of samples of the original *Sunglasses* crops are shown in dark green. Applying Gaussian blur or selecting extremely small crops shifts the embeddings further from the root. The right figure illustrates a clear separation between full-image and part-image embeddings.

classes.

**Emergent structure.** We observe that high-frequency, ambiguous image crops are naturally pushed toward the boundary of hyperbolic space, where more angular entailment constraints can be better satisfied. This aligns with the exponentially growing volume near the boundary, and it is an efficient solution for representing diverse, overlapping semantics. In Figure 4, in the left plot, the percentage of samples of the original *Sunglasses* crops are shown in dark green. Adding Gaussian blur or selecting extremely small crops shifts their embeddings further from the root. The small crops (red curve) are not included in other curves. The right plot shows clear separation between full and part image embeddings.

### 3. Ablation Studies

In this ablation study, we evaluate the impact of cross-image scene-to-object samples. We fine-tuned the CLIP ViT model solely on hierarchical part-based entailment data within individual images (entailment pairs with high visual similarity), excluding any cross-image image-to-bounding-box samples. Fig. 4 in the main paper shows that the hyperbolic model CLIP-hyp<sup>†</sup> fine-tuned without cross-image samples significantly outperforms the Euclidean model CLIP-euc<sup>†</sup> and even surpasses the model trained with additional cross-image samples. This indicates that training in hyperbolic space enhances

| Model                  | Cross-Image | Top-5        | Top-10       | Top-50       | Top-100      |
|------------------------|-------------|--------------|--------------|--------------|--------------|
| <b>Child-to-Parent</b> |             |              |              |              |              |
| CLIP-hyp <sup>†</sup>  | ✓           | <b>73.37</b> | <b>72.59</b> | <b>69.84</b> | <b>68.62</b> |
| CLIP-euc <sup>†</sup>  | ✓           | 67.83        | 68.37        | 67.12        | 66.04        |
| CLIP-hyp <sup>†</sup>  | ✗           | <b>70.47</b> | <b>70.29</b> | <b>67.89</b> | <b>66.38</b> |
| CLIP-euc <sup>†</sup>  | ✗           | 64.98        | 64.49        | 63.51        | 63.10        |
| CLIP                   | -           | 26.73        | 25.95        | 23.69        | 22.70        |
| <b>Parent-to-Child</b> |             |              |              |              |              |
| CLIP-hyp <sup>†</sup>  | ✓           | <b>66.02</b> | <b>66.63</b> | <b>66.50</b> | <b>65.91</b> |
| CLIP-euc <sup>†</sup>  | ✓           | <b>65.38</b> | <b>65.70</b> | <b>66.01</b> | <b>65.79</b> |
| CLIP-hyp <sup>†</sup>  | ✗           | 63.00        | 63.78        | 63.65        | 63.44        |
| CLIP-euc <sup>†</sup>  | ✗           | 60.33        | 60.73        | 61.43        | 61.38        |
| CLIP                   | -           | 47.52        | 46.60        | 43.50        | 42.08        |

Table 1. **Part-based same-class image retrieval evaluation.** Cross-image ✓ indicates models fine-tuned on entailment relationships both within and across images at the category level, while ✗ represents models fine-tuned without cross-image sampling. The evaluation setup is the same as Table 1 in the main paper. The best results are marked in bold, and the second-best results are in blue.

| Metrics       | Model                 | Cross-Image | Top-150k     | Top-200k     | Top-250k     |
|---------------|-----------------------|-------------|--------------|--------------|--------------|
| Recall % ↑    | CLIP-hyp <sup>†</sup> | ✓           | <b>74.06</b> | <b>82.34</b> | <b>88.79</b> |
|               | CLIP-euc <sup>†</sup> | ✓           | 72.96        | 80.98        | 87.97        |
|               | CLIP-hyp <sup>†</sup> | ✗           | <b>73.52</b> | <b>81.58</b> | <b>88.10</b> |
|               | CLIP-euc <sup>†</sup> | ✗           | 71.34        | 78.89        | 86.04        |
|               | CLIP                  | -           | 51.33        | 64.28        | 77.02        |
| OT Distance ↓ | CLIP-hyp <sup>†</sup> | ✓           | <b>16.36</b> | <b>19.27</b> | <b>22.21</b> |
|               | CLIP-euc <sup>†</sup> | ✓           | 17.00        | 20.00        | <b>22.45</b> |
|               | CLIP-hyp <sup>†</sup> | ✗           | <b>16.95</b> | <b>19.77</b> | 22.55        |
|               | CLIP-euc <sup>†</sup> | ✗           | 18.43        | 21.25        | 23.53        |
|               | CLIP                  | -           | 23.81        | 24.60        | 25.03        |

Table 2. **Part-based hierarchical evaluation of parent-to-child image retrieval.** The OT distance is defined in Sec. 3.3 (main paper), and the evaluation setup follows Table 2 (main paper). The best results are marked in bold, and the second-best results are in blue.

the model’s ability to recognize visually dissimilar entailment pairs.

In this supplementary material, we further evaluate these models on part-based same-class and hierarchical image retrieval tasks, as shown in Table. 1-2. The best results are highlighted in bold and the second-best results are shown in blue. The results clearly indicate that cross-image sampling improves image retrieval performance. Notably, the hierarchical retrieval results align with Fig. 4 in the main paper. Specifically, the hyperbolic model trained without cross-image samples outperforms the Euclidean model trained with cross-image samples in 5 out of 6 cases, as shown in Table 2.

## 4. More Qualitative Results

More qualitative parent-to-child retrieval results are shown in Fig. 5 to visualize the latent space. Bounding box images are filtered by angle (CLIP-hyp<sup>†</sup>) or cosine similarity (CLIP ViT model) thresholds and sorted by increasing embedding norms. Our hyperbolic model retrieves diverse and visually distinct lower-level objects related to the query images, organized according to the predefined *scene-object-part* hierarchy in the embedding space.

## References

- [1] Abubakar Abid, Ali Abdalla, Ali Abid, Dawood Khan, Abdulrahman Alfozan, and James Zou. Gradio: Hassle-free sharing and testing of ml models in the wild. *arXiv preprint arXiv:1906.02569*, 2019. 3, 4
- [2] Agrim Gupta, Piotr Dollar, and Ross Girshick. Lvis: A dataset for large vocabulary instance segmentation. In *Proceedings of the IEEE/CVF conference on computer vision and pattern recognition*, pages 5356–5364, 2019. 4
- [3] Alina Kuznetsova, Hassan Rom, Neil Alldrin, Jasper Uijlings, Ivan Krasin, Jordi Pont-Tuset, Shahab Kamali, Stefan Popov, Matteo Mallocci, Alexander Kolesnikov, et al. The open images dataset v4: Unified image classification, object detection, and visual relationship detection at scale. *International journal of computer vision*, 128(7):1956–1981, 2020. 1, 4



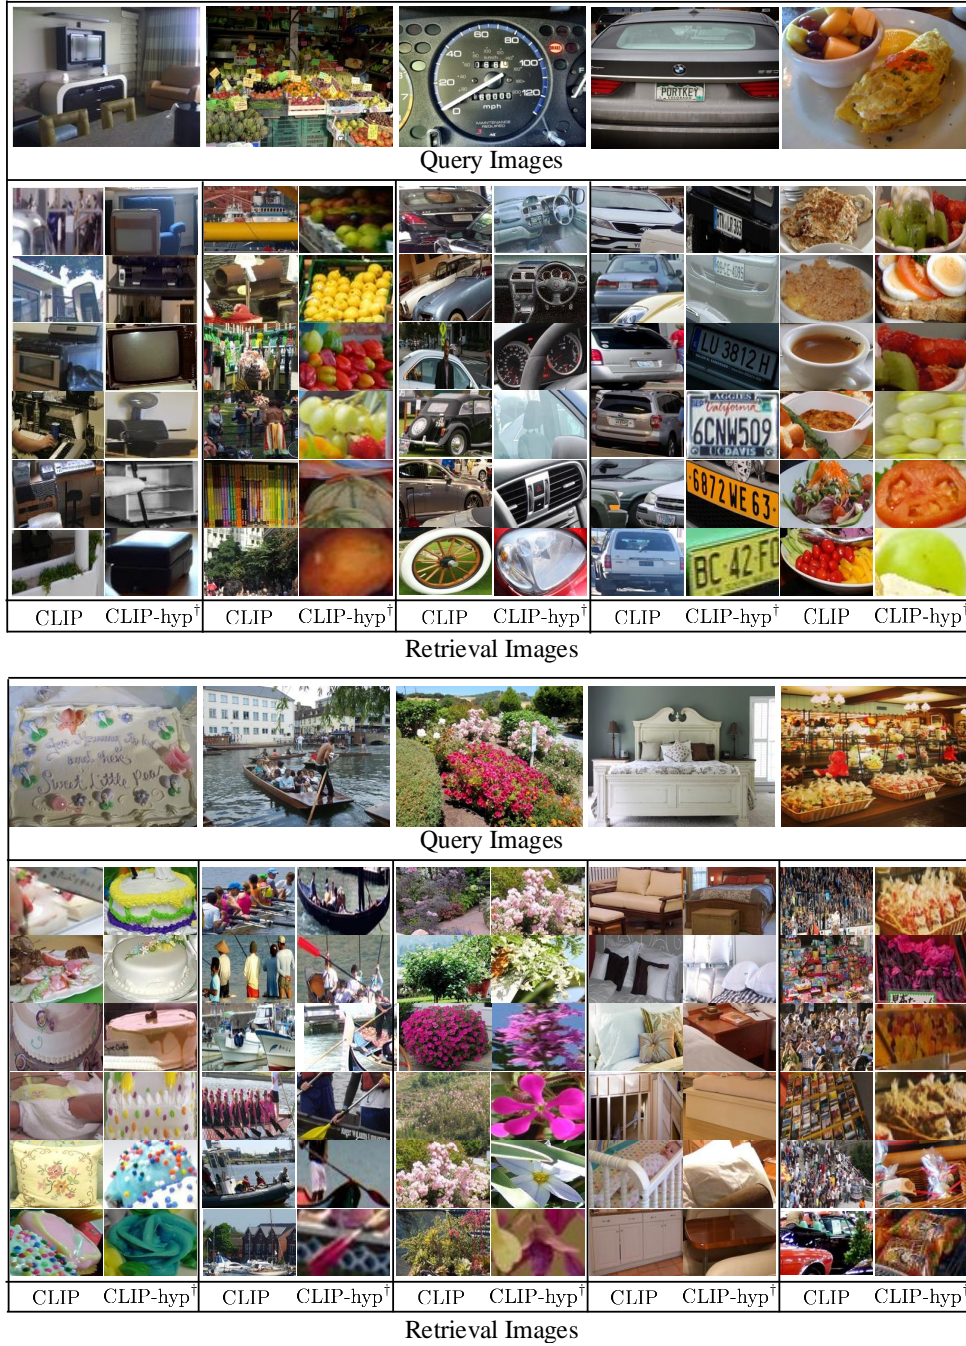

Figure 5. **Example of parent-to-child retrieval using CLIP ViT and our CLIP-hyp<sup>†</sup> model.** Results are ordered by ascending embedding norms. Our model retrieves images matching the predefined *scene-object-part* hierarchy, placing high-level objects near the origin (e.g., group of fruits → single fruits), and grouping semantically related but visually distinct objects (e.g., chairs & TVs). All retrieved bounding box images are scaled to the same ratio.

# Appendix

## Object classes in LVIS dataset but not in OpenImage dataset

|                 |                  |                       |                |                  |                |
|-----------------|------------------|-----------------------|----------------|------------------|----------------|
| aerosol can     | air conditioner  | alcohol               | alligator      | almond           | amplifier      |
| anklet          | antenna          | applesauce            | apricot        | apron            | aquarium       |
| arctic          | armband          | armchair              | armoire        | armor            | trash can      |
| ashtray         | asparagus        | atomizer              | avocado        | award            | awning         |
| baboon          | baby buggy       | basketball back-board | bagpipe        | baguet           | bait           |
| ballet skirt    | bamboo           | Band Aid              | bandage        | bandanna         | banner         |
| barbell         | barrette         | barrow                | baseball base  | baseball         | baseball cap   |
| basket          | basketball       | bass horn             | bat            | bath mat         | bath towel     |
| bathrobe        | batter           | battery               | beachball      | bead             | bean curd      |
| beanbag         | beanie           | bedpan                | bedspread      | cow              | beef           |
| beeper          | beer bottle      | beer can              | bell           | belt buckle      | beret          |
| bib             | Bible            | visor                 | binder         | birdfeeder       | birdbath       |
| birdcage        | birdhouse        | birthday cake         | birthday card  | pirate flag      | black sheep    |
| blackberry      | blackboard       | blanket               | blazer         | blimp            | blinker        |
| blouse          | blueberry        | gameboard             | bob            | bobbin           | bobby pin      |
| boiled egg      | bolo tie         | deadbolt              | bolt           | bonnet           | booklet        |
| bookmark        | boom microphone  | bouquet               | bow            | bow              | bow-tie        |
| pipe bowl       | bowler hat       | bowling ball          | boxing glove   | suspenders       | bracelet       |
| brass plaque    | bread-bin        | breechcloth           | bridal gown    | broach           | broom          |
| brownie         | brussels sprouts | bubble gum            | bucket         | horse buggy      | horned cow     |
| bulldog         | bulldozer        | bullet train          | bulletin board | bulletproof vest | bullhorn       |
| bun             | bunk bed         | buoy                  | business card  | butter           | button         |
| cabana          | cabin car        | cabinet               | locker         | calendar         | calf           |
| camcorder       | camera lens      | camper                | candle holder  | candy bar        | candy cane     |
| walking cane    | canister         | canteen               | cap            | bottle cap       | cape           |
| cappuccino      | railcar          | elevator car          | car battery    | identity card    | card           |
| cardigan        | cargo ship       | carnation             | horse carriage | tote bag         | carton         |
| cash register   | casserole        | cassette              | cast           | cauliflower      | cayenne        |
| CD player       | celery           | chain mail            | chaise longue  | chalice          | chandelier     |
| chap            | checkbook        | checkerboard          | cherry         | chessboard       | chickpea       |
| chili           | chinaware        | crisp                 | poker chip     | chocolate bar    | chocolate cake |
| chocolate milk  | chocolate mousse | choker                | chopstick      | slide            | cider          |
| cigar box       | cigarette        | cigarette case        | cistern        | clarinet         | clasp          |
| cleansing agent | cleat            | clementine            | clip           | clipboard        | clippers       |
| cloak           | clock tower      | clothes hamper        | clothespin     | clutch bag       | coaster        |
| coat hanger     | coatrack         | cock                  | cockroach      | cocoa            | coffee maker   |



|                |               |                 |                      |                   |                    |
|----------------|---------------|-----------------|----------------------|-------------------|--------------------|
| coffepot       | coil          | colander        | coleslaw             | coloring material | combination lock   |
| pacifier       | comic book    | compass         | condiment            | cone              | control            |
| convertible    | cooker        | cooking utensil | cooler               | cork              | corkboard          |
| corkscrew      | edible corn   | cornbread       | cornice              | cornmeal          | corset             |
| costume        | cougar        | coverall        | cowbell              | crabmeat          | cracker            |
| crape          | crate         | crayon          | cream pitcher        | crib              | crock pot          |
| crossbar       | crouton       | crow            | crowbar              | crucifix          | cruise ship        |
| police cruiser | crumb         | cub             | cube                 | cufflink          | cup                |
| trophy cup     | cupcake       | hair curler     | curling iron         | cushion           | cylinder           |
| cymbal         | dalmatian     | dartboard       | date                 | deck chair        | dental floss       |
| detergent      | diary         | dinghy          | dining table         | tux               | dish               |
| dish antenna   | dishrag       | dishtowel       | dishwasher detergent | dispenser         | diving board       |
| Dixie cup      | dog collar    | dollar          | dollhouse            | domestic ass      | doorknob           |
| doormat        | dove          | underdrawers    | dress hat            | dress suit        | dresser            |
| drill          | drone         | dropper         | drumstick            | duckling          | duct tape          |
| duffel bag     | dumpster      | dustpan         | earphone             | earplug           | earring            |
| easel          | eclair        | eel             | egg                  | egg roll          | egg yolk           |
| eggbeater      | eggplant      | electric chair  | elk                  | escargot          | eyepatch           |
| fan            | ferret        | Ferris wheel    | ferry                | fig               | fighter jet        |
| figurine       | file          | fire alarm      | fire engine          | fire extinguisher | fire hose          |
| first-aid kit  | fishbowl      | fishing rod     | flagpole             | flamingo          | flannel            |
| flap           | flash         | fleece          | flip-flop            | flipper           | flower arrangement |
| flute glass    | foal          | folding chair   | footstool            | forklift          | freight car        |
| French toast   | freshener     | frisbee         | fruit juice          | fudge             | funnel             |
| futon          | gag           | garbage         | garbage truck        | garden hose       | gargle             |
| gargoyle       | garlic        | gasmask         | gazelle              | gelatin           | gemstone           |
| generator      | gift wrap     | ginger          | cincture             | glass             | globe              |
| golf club      | golfcart      | gorilla         | gourd                | grater            | gravestone         |
| gravy boat     | green bean    | green onion     | griddle              | grill             | grits              |
| grizzly        | grocery bag   | gull            | gun                  | hairbrush         | hairnet            |
| hairpin        | halter top    | ham             | hammock              | hamper            | hand glass         |
| hand towel     | handcart      | handcuff        | handkerchief         | handle            | handsaw            |
| hardback book  | harmonium     | hatbox          | veil                 | headband          | headboard          |
| headlight      | headscarf     | headset         | headstall            | heart             | heron              |
| highchair      | hinge         | hockey stick    | home plate           | honey             | fume hood          |
| hook           | hookah        | hornet          | hose                 | hot-air balloon   | hotplate           |
| hot sauce      | hourglass     | houseboat       | hummingbird          | hummus            | icecream           |
| popsicle       | ice maker     | ice pack        | ice skate            | igniter           | inhaler            |
| iron           | ironing board | jam             | jar                  | jean              | jeep               |
| jelly bean     | jersey        | jet plane       | jewel                | jewelry           | joystick           |

|                |                 |               |                |                   |                 |
|----------------|-----------------|---------------|----------------|-------------------|-----------------|
| jumpsuit       | kayak           | keg           | kennel         | key               | keycard         |
| kilt           | kimono          | kitchen sink  | kitchen table  | kitten            | kiwi fruit      |
| knee pad       | knitting needle | knob          | knocker        | lab coat          | lamb            |
| lamb-chop      | lamppost        | lampshade     | lanyard        | laptop computer   | lasagna         |
| latch          | lawn mower      | leather       | legging        | Lego              | legume          |
| lemonade       | lettuce         | license plate | life buoy      | life jacket       | lightbulb       |
| lightning rod  | lime            | lip balm      | liquor         | log               | lollipop        |
| speaker        | machine gun     | magazine      | magnet         | mail slot         | mailbox         |
| mallard        | mallet          | mammoth       | manatee        | mandarin orange   | manager         |
| manhole        | map             | marker        | martini        | mascot            | mashed potato   |
| masher         | mask            | mast          | mat            | matchbox          | mattress        |
| meatball       | medicine        | melon         | microscope     | milestone         | milk can        |
| milkshake      | minivan         | mint candy    | mitten         | money             | monitor         |
| motor          | motor scooter   | motor vehicle | mound          | mousepad          | music stool     |
| nailfile       | napkin          | neckerchief   | needle         | nest              | newspaper       |
| newsstand      | nightshirt      | nosebag       | noseband       | notebook          | notepad         |
| nut            | nutcracker      | oar           | octopus        | octopus           | oil lamp        |
| olive oil      | omelet          | onion         | orange juice   | ottoman           | overalls        |
| packet         | inkpad          | pad           | padlock        | paintbrush        | painting        |
| pajamas        | palette         | pan           | pan            | pantyhose         | papaya          |
| paper plate    | paperback book  | paperweight   | parakeet       | parasail          | parasol         |
| parchment      | parka           | passenger car | passenger ship | passport          | patty           |
| pea            | peanut butter   | peeler        | wooden leg     | pegboard          | pelican         |
| pencil         | pendulum        | pennant       | penny          | pepper            | pepper mill     |
| persimmon      | pet             | pew           | phonebook      | phonograph record | pickle          |
| pickup truck   | pie             | pigeon        | piggy bank     | pin               | pinecone        |
| ping-pong ball | pinwheel        | tobacco pipe  | pipe           | pita              | pitcher         |
| pitchfork      | place mat       | playpen       | pliers         | plow              | plume           |
| pocket watch   | pocketknife     | poker         | pole           | polo shirt        | poncho          |
| pony           | pop             | postbox       | postcard       | pot               | potholder       |
| pottery        | pouch           | power shovel  | projector      | propeller         | prune           |
| pudding        | puffer          | puffin        | pug-dog        | puncher           | puppet          |
| puppy          | quesadilla      | quiche        | quilt          | race car          | radar           |
| radiator       | radio receiver  | raft          | rag doll       | raincoat          | ram             |
| raspberry      | rat             | razorblade    | reamer         | rearview mirror   | receipt         |
| recliner       | record player   | reflector     | rib            | ring              | river boat      |
| road map       | robe            | rocking chair | rodent         | roller skate      | Rollerblade     |
| rolling pin    | root beer       | router        | rubber band    | runner            | saddle          |
| saddle blanket | saddlebag       | safety pin    | sail           | salad plate       | salami          |
| salmon         | salmon          | salsa         | saltshaker     | satchel           | saucepan        |
| sausage        | sawhorse        | scarecrow     | school bus     | scraper           | scrubbing brush |

|                |                  |                   |                 |                |                    |
|----------------|------------------|-------------------|-----------------|----------------|--------------------|
| seabird        | seaplane         | seashell          | shaker          | shampoo        | sharpener          |
| Sharpie        | shaver           | shaving cream     | shawl           | shears         | shepherd dog       |
| sherbert       | shield           | shoe              | shopping bag    | shopping cart  | shot glass         |
| shoulder bag   | shovel           | shower head       | shower cap      | shower curtain | shredder           |
| signboard      | silo             | skewer            | ski boot        | ski parka      | ski pole           |
| skullcap       | sled             | sleeping bag      | sling           | slipper        | smoothie           |
| soap           | soccer ball      | softball          | solar array     | soup           | soup bowl          |
| soupspoon      | sour cream       | soya milk         | space shuttle   | sparkler       | spear              |
| crawfish       | sponge           | sportswear        | spotlight       | stagecoach     | statue             |
| steak          | steak knife      | steering wheel    | stepladder      | step stool     | stereo             |
| stew           | stirrer          | stirrup           | brake light     | stove          | strainer           |
| strap          | street sign      | streetlight       | string cheese   | stylus         | subwoofer          |
| sugar bowl     | sugarcane        | sunflower         | sunhat          | mop            | sweat pants        |
| sweatband      | sweater          | sweatshirt        | sweet potato    | Tabasco sauce  | table-tennis table |
| table lamp     | tablecloth       | tachometer        | tag             | taillight      | tambourine         |
| army tank      | tank top         | tape              | tape measure    | tapestry       | tarp               |
| tartan         | tassel           | tea bag           | teacup          | teakettle      | telephone booth    |
| telephone pole | telephoto lens   | television camera | television set  | tequila        | thermometer        |
| thermos bottle | thermostat       | thimble           | thread          | thumbtack      | tights             |
| timer          | tinfoil          | tinsel            | tissue paper    | toast          | toaster oven       |
| tongs          | toolbox          | toothpaste        | toothpick       | cover          | tortilla           |
| tow truck      | towel rack       | tractor           | dirt bike       | trailer truck  | trampoline         |
| tray           | trench coat      | triangle          | tricycle        | truffle        | trunk              |
| vat            | turban           | turnip            | turtleneck      | typewriter     | underwear          |
| urinal         | urn              | vacuum cleaner    | vending machine | vent           | vest               |
| videotape      | vinegar          | vodka             | volleyball      | vulture        | wagon              |
| wagon wheel    | walking stick    | wall socket       | wallet          | walrus         | washbasin          |
| water bottle   | water cooler     | water heater      | water jug       | water gun      | water ski          |
| water tower    | watering can     | weathervane       | webcam          | wedding cake   | wedding ring       |
| wet suit       | whipped cream    | whistle           | wig             | wind chime     | windmill           |
| window box     | windshield wiper | windsock          | wine bottle     | wine bucket    | wineglass          |
| blinder        | wolf             | wooden spoon      | wreath          | wristband      | wristlet           |
| yacht          | yogurt           | yoke              |                 |                |                    |
